# Supplementary material
Source: PubMed Central journal article supplement (PMC5047009)
Supplement: NIHMS749933-supplement-supplement_1.pdf [file NIHMS749933-supplement-supplement_1.pdf]

## **SUPPLEMENTARY TABLES**

Table I. Odds Ratio of CAC presence (Agatston score  $\geq 10$  per 1SD elevation in lipid parameter).

| Parameter   | Model                   | OR   | 95% CI      | P value |
|-------------|-------------------------|------|-------------|---------|
| LDL-P       | Base covt               | 1.27 | 1.09 , 1.48 | 0.002   |
|             | Base covt + LDL-C       | 1.29 | 0.99 , 1.68 | 0.063   |
|             | Base covt + TG          | 1.25 | 1.08 , 1.46 | 0.004   |
|             | Base covt + TC          | 1.22 | 1.01 , 1.49 | 0.042   |
|             | Base covt + HDL-C       | 1.24 | 1.06 , 1.46 | 0.008   |
|             | Base covt + HDL-P       | 1.25 | 1.07 , 1.46 | 0.005   |
|             | Base covt + LDL size    | 1.21 | 1.02 , 1.43 | 0.025   |
|             | Base covt + Non-HDL-C   | 1.12 | 0.88 , 1.43 | 0.359   |
|             | Base covt + LDL-C/HDL-C | 1.21 | 0.95 , 1.55 | 0.130   |
|             | Base covt + TC/HDL-C    | 1.14 | 0.93 , 1.40 | 0.198   |
| LDL-C       | Base covt               | 1.23 | 1.05 , 1.44 | 0.010   |
|             | Base covt + LDL-P       | 1.00 | 0.76 , 1.31 | 0.976   |
| Non-HDL-C   | Base covt               | 1.29 | 1.10 , 1.50 | 0.001   |
|             | Base covt + LDL-P       | 1.17 | 0.91 , 1.51 | 0.213   |
| LDL-C/HDL-C | Base covt               | 1.26 | 1.08 , 1.48 | 0.004   |
|             | Base covt + LDL-P       | 1.08 | 0.84 , 1.39 | 0.546   |
| TC/HDL-C    | Base covt               | 1.29 | 1.10 , 1.51 | 0.002   |
|             | Base covt + LDL-P       | 1.17 | 0.95 , 1.45 | 0.148   |

Models were adjusted for base covariates (Base covt): age, SBP, hypertension medication (yes/no), smoking status (yes/no), diabetes (yes/no), alcohol intake, and type of CT scan (EBCT/MDCT).

OR = odds ratio, CI = confidence interval, TG = triglycerides, TC = total cholesterol.

CAC presence was defined as an Agatston score of  $\geq 10$ .

Table II. Estimated excess in cIMT and OR of CAC presence per 1 standard deviation (SD)

elevation in small or large LDL-P.

| Model              | cIMT<br>( $\mu\text{m}$ ) | 95% CI    | P value | CAC<br>(OR) | 95% CI      | P value |
|--------------------|---------------------------|-----------|---------|-------------|-------------|---------|
| <b>Small LDL-P</b> |                           |           |         |             |             |         |
| Base covt          | 21.4                      | 10.8 , 32 | <0.001  | 1.43        | 1.21 , 1.69 | <0.001  |
| Base covt + LDL-P  | -4.8                      | -21 , 12  | 0.565   | 1.34        | 1.04 , 1.72 | 0.025   |
| <b>Large LDL-P</b> |                           |           |         |             |             |         |
| Base covt          | 10.9                      | 0.2 , 22  | 0.045   | 0.88        | 0.75 , 1.04 | 0.135   |
| Base covt + LDL-P  | 4.6                       | -6.1 , 15 | 0.399   | 0.82        | 0.69 , 0.97 | 0.019   |

Base covariates (Base covt) include: age, SBP, hypertension medication (yes/no), and smoking status (yes/no), diabetes (yes/no) and alcohol intake. 1 SD of small LDL-P = 415.3 nmol/l and large LDL-P = 294.7 nmol/l.

cIMT = carotid intima-media thickness, OR = odds ratio, CAC = coronary artery calcification, CI = confidence interval, TG = triglycerides, TC = total cholesterol.

CAC presence was defined as an Agatston score of >0.

Table III. Age-adjusted Spearman correlations of LDL-P with select cardiovascular risk factors and lipid measures

| Risk Factor                        | Total LDL-P |
|------------------------------------|-------------|
| Body mass index, kg/m <sup>2</sup> | 0.31        |
| Total Cholesterol, mg/dL           | 0.61        |
| Triglyceride, mg/dL                | 0.29        |
| LDL-C, mg/dL                       | 0.81        |
| HDL-C, mg/dL                       | -0.41       |
| HDL-P, μmol/L                      | -0.23       |
| Large LDL-P, nmol/L †              | 0.16        |
| Small LDL-P, nmol/L †              | 0.79        |
| LDL size (mean), nm                | -0.42       |
| Non HDL-C, mg/dL                   | 0.80        |
| LDL-C/HDL-C                        | 0.79        |
| Total Cholesterol / HDL-C          | 0.72        |

All Spearman correlations were partially adjusted for age and significant (p<0.001).

† Small LDL-P and Large LDL-P were defined as LDL particles within 18.3-21.2nm and 21.3-23nm, respectively.
